# Supplementary material for: Who Is Attending? The Role of Child Ethnicity and Maternal Demographics in Research Engagement and Early Identification of Autism
Source: MDPI journal article supplement (doi:10.3390/brainsci13060903), 2023-06-02
Supplement: s1 [file s1]

**Table S1.** Overall correlations between demographic and outcome measures.

|                            | 2. Overall diagnosis | 3. LGA  | 4. SEIFA | 5. Maternal education | 6. Maternal employment | 7. Language spoken at home | 8. Annual family income |
|----------------------------|----------------------|---------|----------|-----------------------|------------------------|----------------------------|-------------------------|
| 1. Child Ethnicity         | 0.0530               | -0.0250 | -.2596** | .1370*                | -0.0415                | .5614**                    | -0.0722                 |
| 2. Overall Diagnosis       |                      | -0.0349 | -.1260*  | -0.0618               | .0582                  | 0.0693                     | -0.0550                 |
| 3. LGA                     |                      |         | .1253*   | -0.0411               | 0.0158                 | -0.0503                    | -0.0848                 |
| 4. SEIFA                   |                      |         |          | .1759**               | -0.0808                | -.2575**                   | .1081*                  |
| 5. Maternal education      |                      |         |          |                       | -.1637**               | 0.0780                     | .0979                   |
| 6. Maternal employment     |                      |         |          |                       |                        | -0.0455                    | -.2353**                |
| 7. Language spoken at home |                      |         |          |                       |                        |                            | 0.0294                  |
| 8. Annual family income    |                      |         |          |                       |                        |                            |                         |

Notes: LGA =Local Government Area, SEIFA; Socioeconomic Index for Areas.

\*\*Correlation significant <0.01, \* Correlation significant <0.05

**Table S2.** Correlations between demographic and outcome measures children of EME

|                            | 2. LGA  | 3. SEIFA | 4. Maternal education | 5. Maternal employment | 6. Language spoken at home | 7. Annual family income |
|----------------------------|---------|----------|-----------------------|------------------------|----------------------------|-------------------------|
| 1. Overall Diagnosis       | -0.0138 | -0.0488  | -0.0678               | .1350*                 | 0.0287                     | -0.0754                 |
| 2. LGA                     |         | 0.1040   | -0.1217               | 0.0640                 | 0.0230                     | -0.1058                 |
| 3. SEIFA                   |         |          | .1464*                | -0.0018                | -0.0307                    | 0.0891                  |
| 4. Maternal Education      |         |          |                       | -0.0941                | 0.0457                     | .2799**                 |
| 5. Maternal Employment     |         |          |                       |                        | -0.0202                    | -0.0760                 |
| 6. Language spoken at home |         |          |                       |                        |                            | 0.0675                  |
| 7. Annual family income    |         |          |                       |                        |                            |                         |

Notes: LGA =Local Government Area, SEIFA; Socioeconomic Index for Areas.

\*\*Correlation significant <0.01, \* Correlation significant <0.05

**Table S3.** Correlations between demographic and outcome measures for children of MME

|                            | 2. LGA  | 3. SEIFA  | 4. Maternal education | 5. Maternal employment | 6. Language spoken at home | 7. Annual family income |
|----------------------------|---------|-----------|-----------------------|------------------------|----------------------------|-------------------------|
| 1. Overall Diagnosis       | -0.1091 | -0.6447** | -0.3760               | .5229*                 | 0.4193                     | -0.2334                 |
| 2. LGA                     |         | 0.2996    | 0.0206                | -0.0794                | -0.1949                    | -0.1013                 |
| 3. SEIFA                   |         |           | .5365*                | -0.3371                | -.6504**                   | 0.1092                  |
| 4. Maternal Education      |         |           |                       | -0.0925                | -0.2272                    | 0.0141                  |
| 5. Maternal Employment     |         |           |                       |                        | 0.2193                     | -0.1667                 |
| 6. Language spoken at home |         |           |                       |                        |                            | -0.1337                 |
| 7. Annual family income    |         |           |                       |                        |                            |                         |

Notes: LGA =Local Government Area, SEIFA; Socioeconomic Index for Areas.

\*\*Correlation significant <0.01, \* Correlation significant <0.05

**Table S4.** Correlations between demographic and outcome measures for children of N-EME

|                            | 2. LGA | 3. SEIFA | 4. Maternal education | 5. Maternal employment | 6. Language spoken at home | 7. Annual family income |
|----------------------------|--------|----------|-----------------------|------------------------|----------------------------|-------------------------|
| 1. Overall Diagnosis       | 0.0424 | -0.1841  | 0.1119                | -0.0541                | -0.0340                    | -0.0787                 |
| 2. LGA                     |        | 0.1854   | 0.0952                | -0.1511                | -0.1446                    | 0.0927                  |
| 3. SEIFA                   |        |          | 0.3391**              | -0.2169*               | -.2316*                    | 0.0968                  |
| 4. Maternal Education      |        |          |                       | -.0753                 | -0.0616                    | 0.2483*                 |
| 5. Maternal Employment     |        |          |                       |                        | 0.0854                     | -.0929                  |
| 6. Language spoken at home |        |          |                       |                        |                            | 0.1816                  |
| 7. Annual family income    |        |          |                       |                        |                            |                         |

Notes: LGA =Local Government Area, SEIFA; Socioeconomic Index for Areas.

\*\*Correlation significant <0.01, \* Correlation significant <0.05
